# Supplementary material for: Electrocatalytic performance of Pt–Ni nanoparticles supported on an activated graphite electrode for ethanol and 2-propanol oxidation
Source: Royal Society of Chemistry journal article supplement (doi:10.1039/d0ra07331h), 2020-01-01
Supplement: d0ra07331h1.pdf [file d0ra07331h1.pdf]

## Supplementary Data

### **Electrocatalytic Performance of Pt–Ni Nanoparticles Supported on Activated Graphite Electrode for Ethanol and 2-Propanol Oxidation**

M. L. Chelaghmia<sup>1,\*</sup>, M. Nacef<sup>1</sup>, H. Fisli<sup>2</sup>, A. M. Affoune<sup>1</sup>, M. Pontié<sup>3</sup>, A. Makhlouf<sup>4</sup>, T. Derabla<sup>1</sup>, O. Khelifi<sup>1</sup>, F. Aissat<sup>5</sup>

<sup>1</sup> Laboratoire d'Analyses Industrielles et Génie des Matériaux, Département de Génie des Procédés, Université 8 Mai 1945 Guelma, BP 401, Guelma 24000, Algeria.

<sup>2</sup> Laboratoire de chimie appliquée, Département des sciences de la matière, Université 8 Mai 1945 Guelma, BP 401, Guelma 24000, Algeria.

<sup>3</sup> University of Angers, 4 Rue Larrey, 49933 Angers Cedex 9, Angers, France Group Analysis and Processes, Dpt. of Chemistry, 2 Bd. Lavoisier 49045 Angers cedex 01.

<sup>4</sup> Laboratoire des Silicates, Polymères et Nanocomposites, Université du 8 Mai 1945, Algérie.

<sup>5</sup> Centre de Recherche Scientifique et Technique en Analyses Physico-chimiques « CRAPC »

[\*]Corresponding author: chelaghmia.mohamedlyamine@univ-guelma.dz;  
amine\_chelaghmia@yahoo.fr

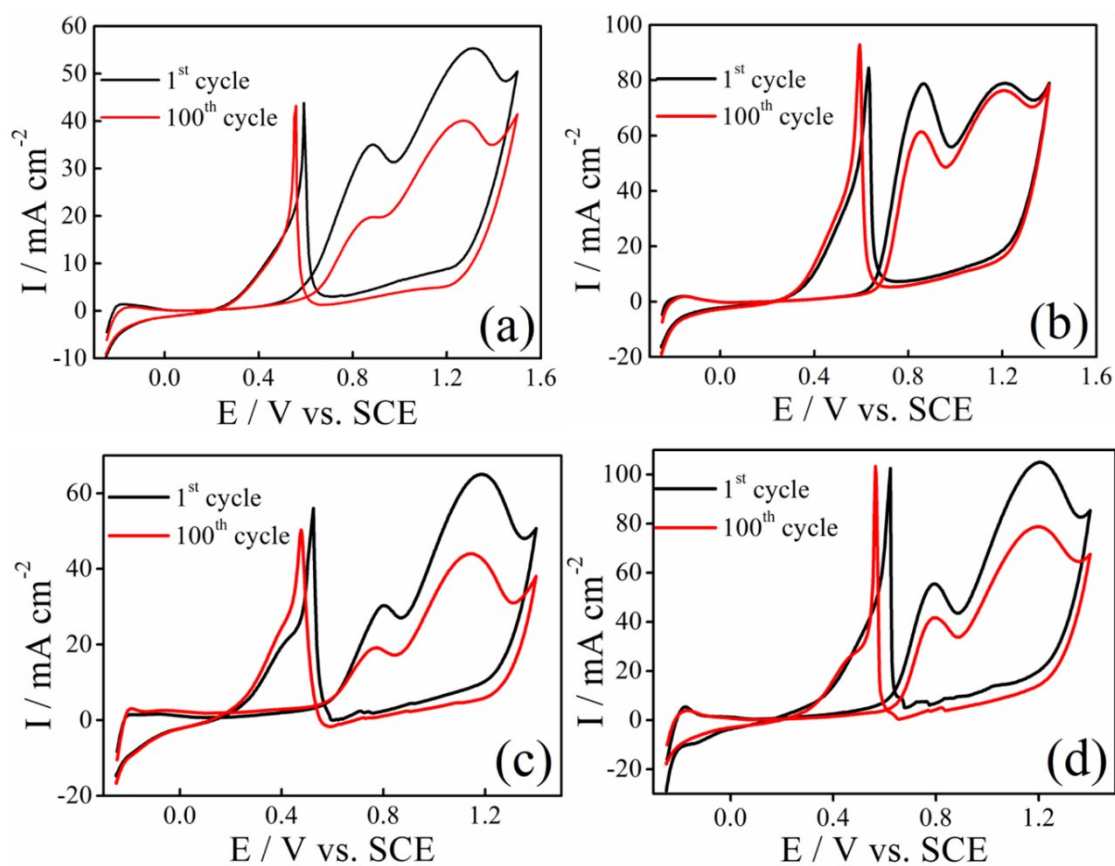

**Fig. 1S** Repeated cyclic voltammograms for ethanol and 2-propanol electrooxidation on Pt/C (a and c), and Pt-Ni/C (b and d). Scan rate of 50 mV s<sup>-1</sup>.

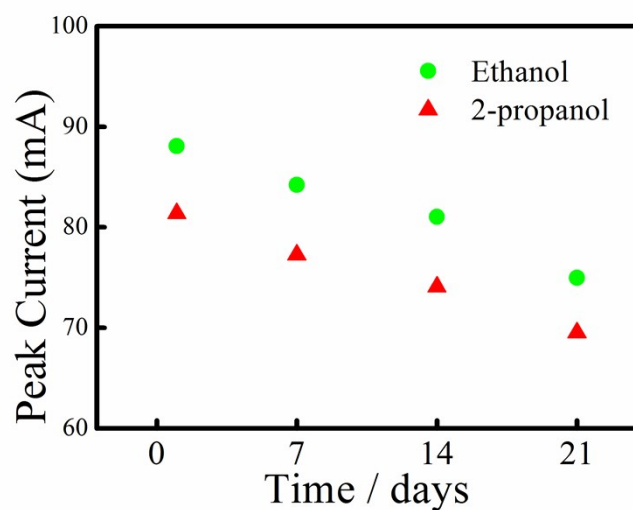

**Fig. 2S** The electrocatalyst stability of the proposed electrode for ethanol and 2-propanol tested at intervals of seven days for twenty one days.

**Table 1S** Electrocatalytic performances of the some electrocatalysts prepared with different methods in the oxidation of ethanol and 2-propanol

| Electrocatalyst   | Preparation method             | Electrolytes                                                                      | Onset Potential (V/SCE) | Current density (mA cm <sup>2</sup> ) | Peak potential (V/SCE) | Ref.      |
|-------------------|--------------------------------|-----------------------------------------------------------------------------------|-------------------------|---------------------------------------|------------------------|-----------|
| <b>PtRh/C</b>     | Electrochemical method         | 0.1 M H <sub>2</sub> SO <sub>4</sub> + 1.0 M CH <sub>3</sub> CH <sub>2</sub> OH   | 0.308                   | 43.88                                 | 0.68                   | [19]      |
| <b>PtSnNi/C</b>   | Impregnation/reduction method  | 0.5 M H <sub>2</sub> SO <sub>4</sub> + 1.0 M CH <sub>3</sub> CH <sub>2</sub> OH   | 0.310                   | 60.28                                 | 0.781                  | [34]      |
| <b>Pt-Ni/CCE</b>  | Electrochemical method         | 0.1 M H <sub>2</sub> SO <sub>4</sub> + 0.15 M CH <sub>3</sub> CH <sub>2</sub> OH  | 0.318                   | 145.23                                | 0.75                   | [15]      |
| <b>Pt-Ru-Ni/C</b> | Chemical reduction method      | 0.5 M H <sub>2</sub> SO <sub>4</sub> + 0.5 M CH <sub>3</sub> CH <sub>2</sub> OH   | 0.358                   | 14.52                                 | 0.688                  | [35]      |
| <b>Pt/SiC/EG</b>  | Carbo-thermal reduction method | 0.5 M H <sub>2</sub> SO <sub>4</sub> + 0.5 M CH <sub>3</sub> CH <sub>2</sub> OH   | 0.245                   | 15                                    | 0.63                   | [36]      |
| <b>Pt-Ni/CCE</b>  | Electrochemical method         | 0.1 M H <sub>2</sub> SO <sub>4</sub> + 0.15 M CH <sub>3</sub> CHOHCH <sub>3</sub> | -0.1                    | 43.61                                 | 0.52                   | [17]      |
| <b>Pt-Ni/C</b>    | Electrochemical method         | 0.1 M H <sub>2</sub> SO <sub>4</sub> + 1 M CH <sub>3</sub> CH <sub>2</sub> OH     | 0.54                    | 61.68                                 | 0.81                   | This work |
| <b>Pt-Ni/C</b>    | Electrochemical method         | 0.1 M H <sub>2</sub> SO <sub>4</sub> + 1.0 M CH <sub>3</sub> CHOHCH <sub>3</sub>  | 0.1                     | 28.26                                 | 0.71                   | This work |
